# Supplementary material for: Pyrolysis of Solid Digestate from Sewage Sludge and Lignocellulosic Biomass: Kinetic and Thermodynamic Analysis, Characterization of Biochar
Source: MDPI journal article supplement (doi:10.3390/su13179642), 2021-08-27
Supplement: s1 [file s1]

Supplementary material for Article

# Pyrolysis of solid digestate from sewage sludge and lignocellulosic biomass: kinetic and thermodynamic analysis, characterization of biochar

Aleksandra Petrovič<sup>1\*</sup>, Sabina Vohl<sup>1</sup>, Tjaša Cencič Predikaka<sup>2</sup>, Robert Bedoić<sup>3</sup>, Marjana Simonič<sup>1</sup>, Irena Ban<sup>1</sup> and Lidija Čuček<sup>1</sup>

<sup>1</sup> Faculty of Chemistry and Chemical Engineering, University of Maribor, Smetanova ul. 17, 2000 Maribor, Slovenia; lidija.cucek@um.si (L.Č.)

<sup>2</sup> IKEMA d.o.o., Institute for chemistry, ecology, measurements and analytics, Lovrenc na Dravskem polju 4, 2324 Lovrenc na Dravskem polju, Slovenia; tjasa@ikema.si (T.C.P.)

<sup>3</sup> Faculty of Mechanical Engineering and Naval Architecture, University of Zagreb, Ul. Ivana Lučića 5, 10000 Zagreb, Croatia; robert.bedoic@fsb.hr (R.B.)

\* Correspondence: aleksandra.petrovic@um.si

**Table S1:** Composition of the digestate mixtures D1 and D2.

| Digestate | Inoculum<br>(g d.m.) | Sewage sludge<br>(g d.m.) | <i>Typha latifolia</i> plant<br>(g d.m.) | Cattle rumen<br>fluid (mL) |
|-----------|----------------------|---------------------------|------------------------------------------|----------------------------|
| D1        | 15                   | 15                        | /                                        | 50                         |
| D2        | 15                   | 7.5                       | 7.5                                      | 50                         |

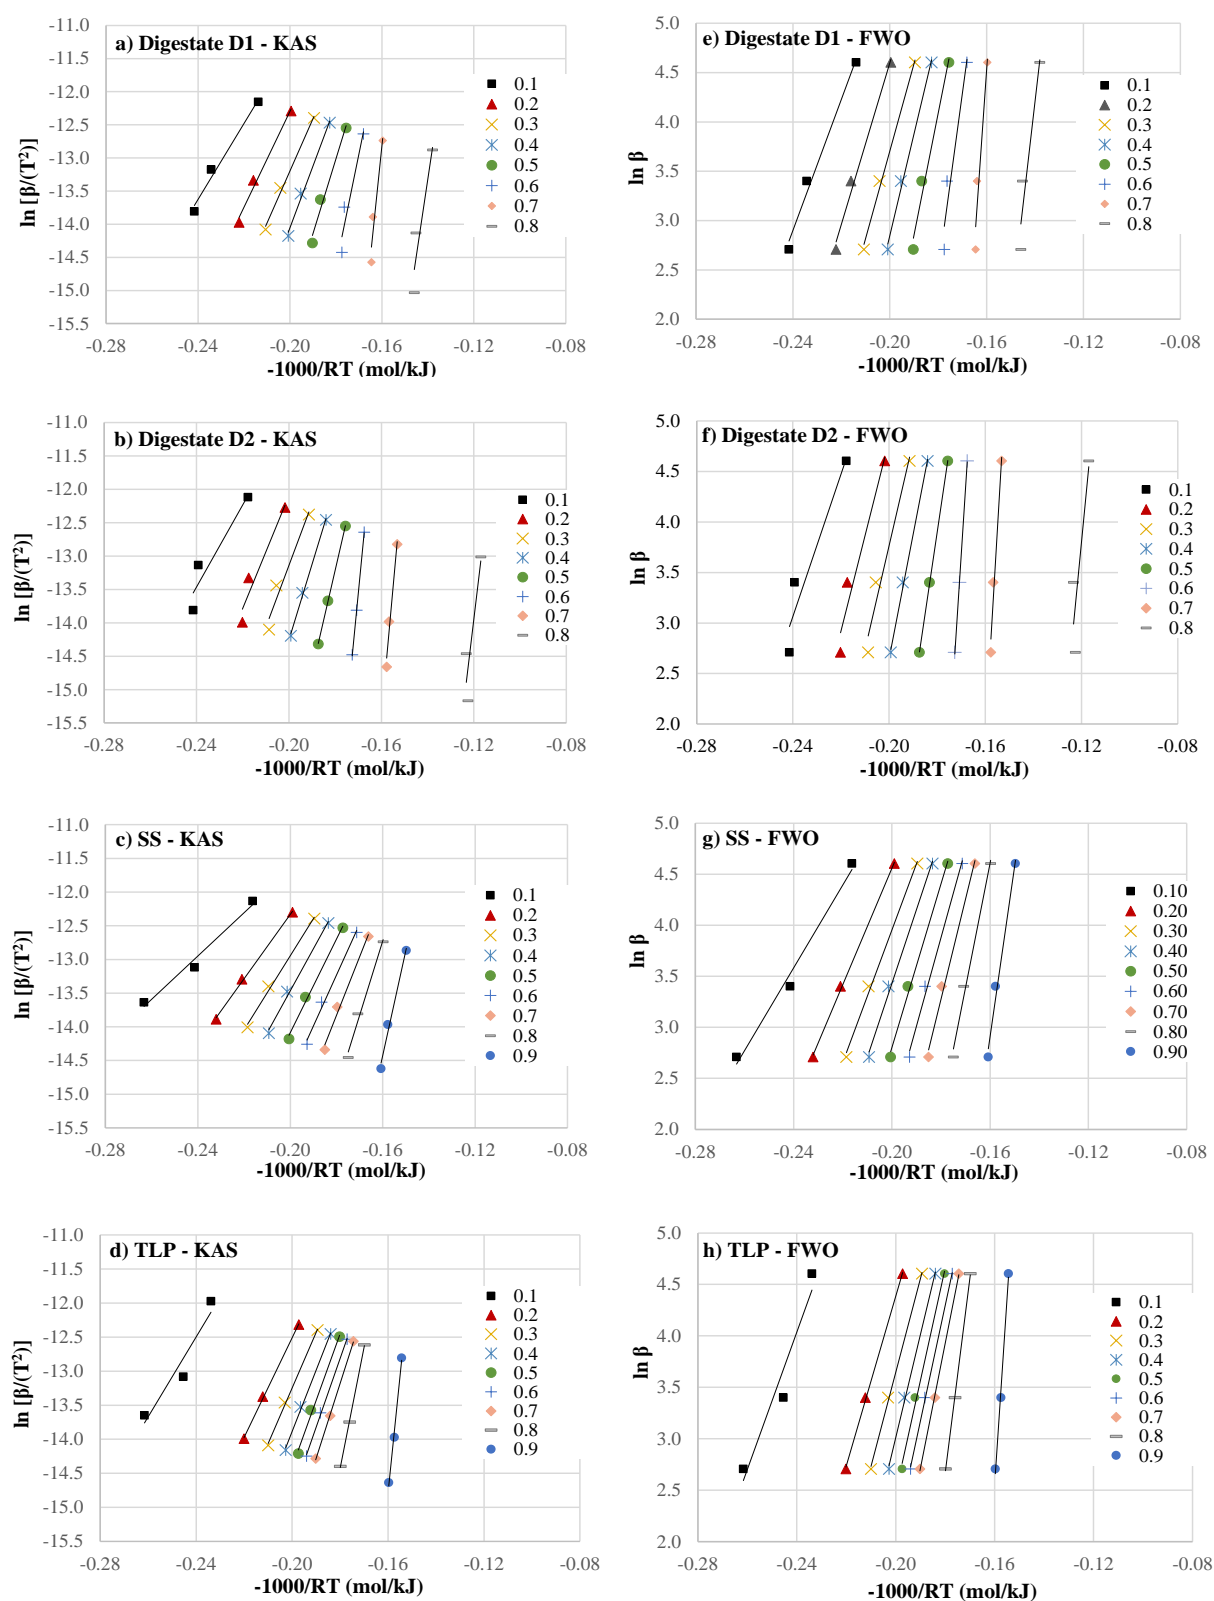

**Figure S1.** Linear fit plots for FWO (a-d) and KAS method (e-h) to determine activation energy values for digestate D1 (a, e), digestate D2 (b, f), sewage sludge (c, g), and *T. latifolia* (d, h).

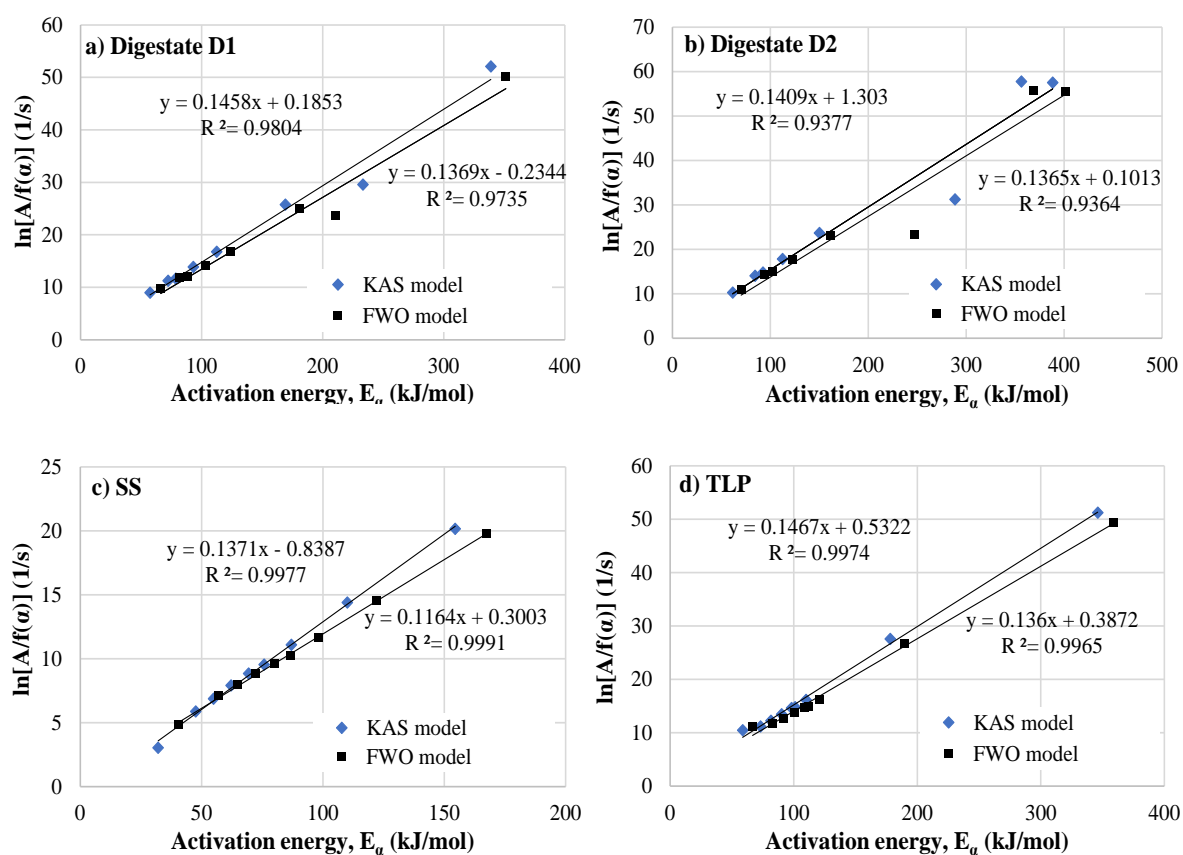

**Figure S2.** Linear fit plots for the compensation effects between the pre-exponential factors  $\ln(A/f(\alpha))$  and the activation energy  $E_\alpha$  for: a) digestate D1 b) digestate D2 c) sewage sludge and d) *T. Latifolia*

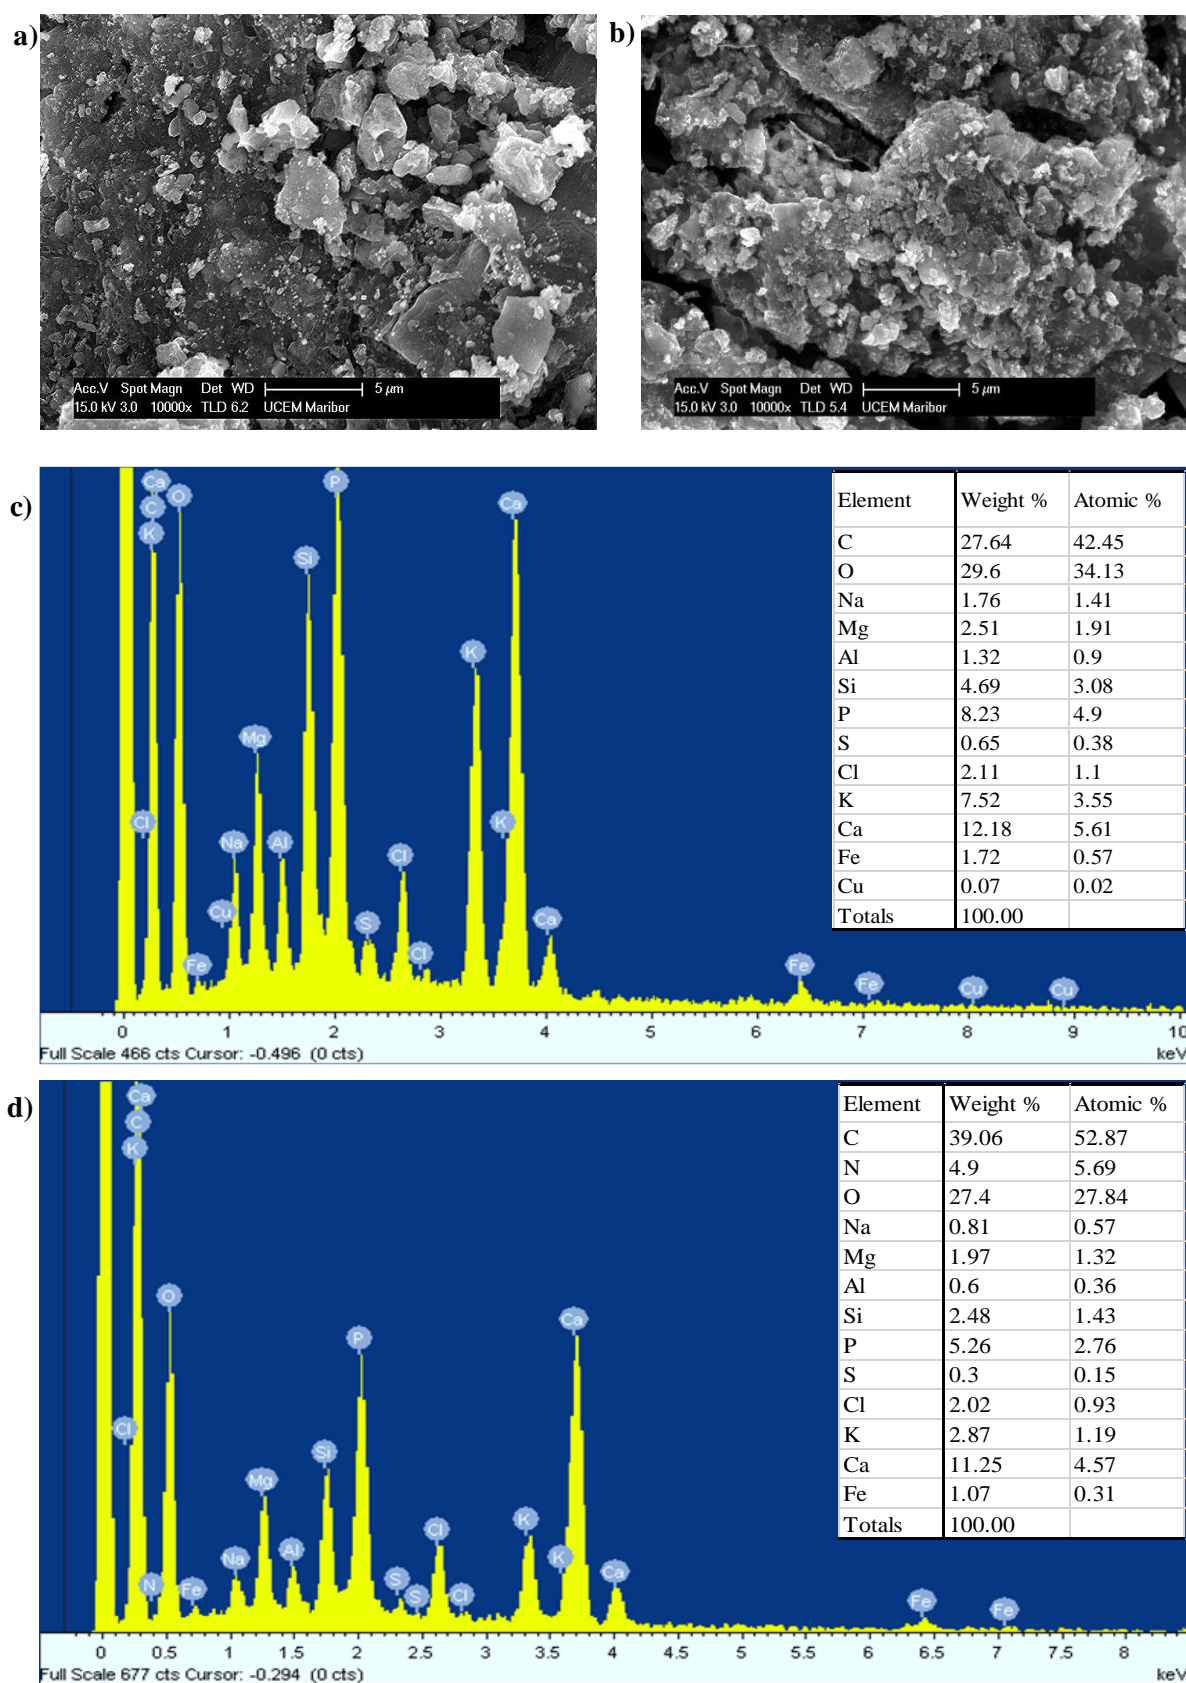

**Figure S3.** SEM images of biochars B-D1 (a) and B-D2 (b), and EDS spectra of biochars B-D1 (c) and B-D2 (d).

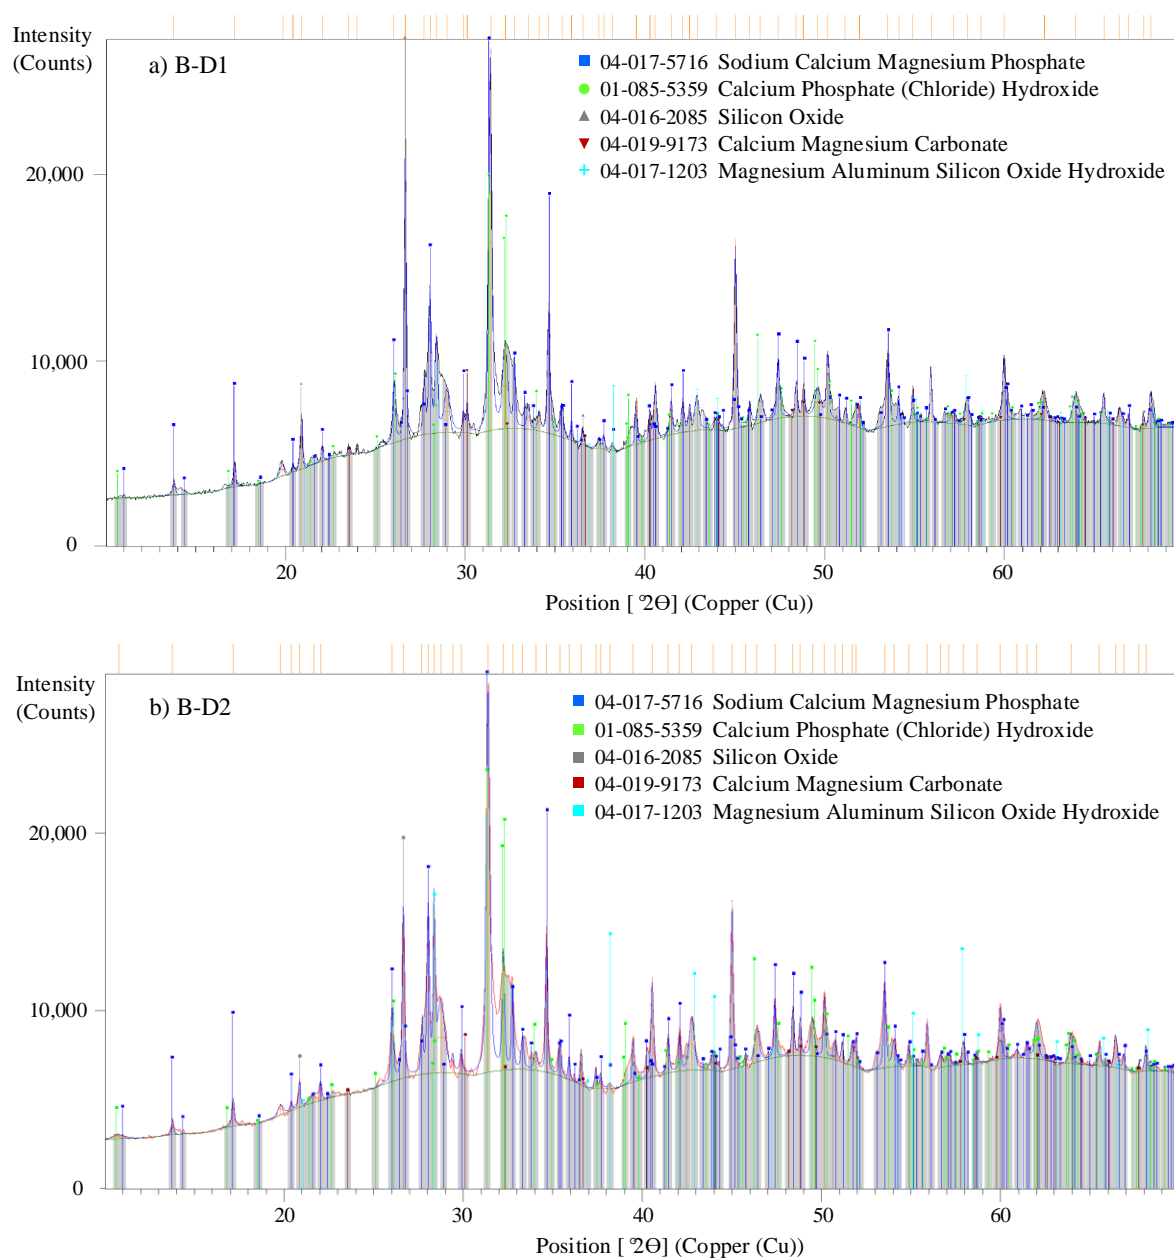

**Figure S4.** The XRD diffractograms of biochars B-D1 (a) and B-D2 (b).
